# Supplementary material for: Validation of ACE-FTS version 5.2 ozone data with ozonesonde measurements
Source: Copernicus journal article supplement (doi:10.5194/egusphere-2024-1916), 2024-07-05
Supplement: Supplementary file 1 [file egusphere-2024-1916-supplement.pdf]

Supplement

## Validation of ACE-FTS version 5.2 ozone data with ozonesonde measurements

Jiansheng Zou<sup>1</sup>, Kaley A. Walker<sup>1</sup>, Patrick E. Sheese<sup>1</sup>, Chris D. Boone<sup>2</sup>, Ryan M. Stauffer<sup>3</sup>, Anne M. Thompson<sup>3</sup>, David W. Tarasick<sup>4</sup>

<sup>1</sup>Department of Physics, University of Toronto, Toronto, Ontario, Canada

<sup>2</sup>Department of Chemistry, University of Waterloo, Waterloo, Ontario, Canada

<sup>3</sup>NASA/Goddard Space Flight Center (GSFC), Greenbelt, MD, USA

<sup>4</sup>Environment and Climate Change Canada, Downsview, Toronto, Ontario, Canada

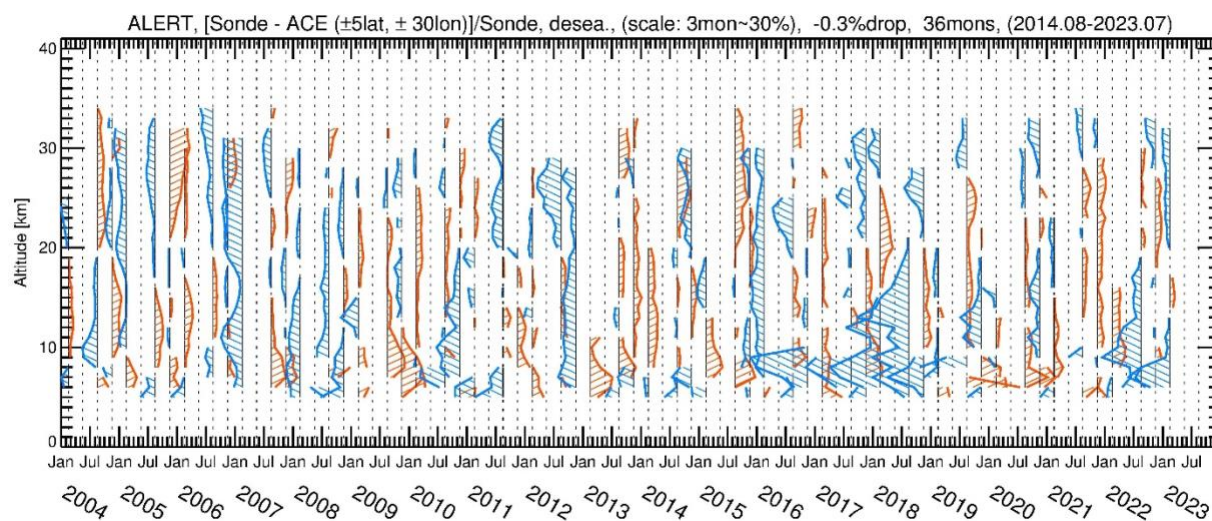

Fig. S1 Seasonally averaged relative differences (%) between the ozonesonde and ACE-FTS de-seasonalized monthly mean time series at Alert, Canada. The red/blue colors indicate the positive/negative differences, respectively. A scale of 30% relative difference is represented by the distance between the two adjacent dashed lines (3 months). The drop-off amount, the period, and the number of months of operating EnSci sondes with S/N > 25000 are indicated at the top. The following figures are similar for the different stations.

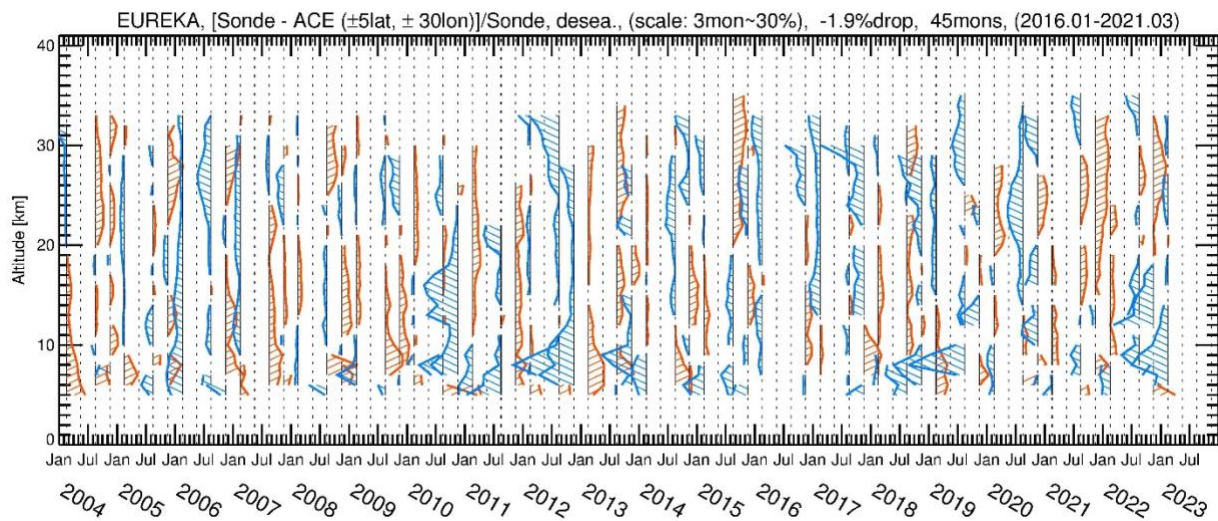

Fig. S2 Eureka

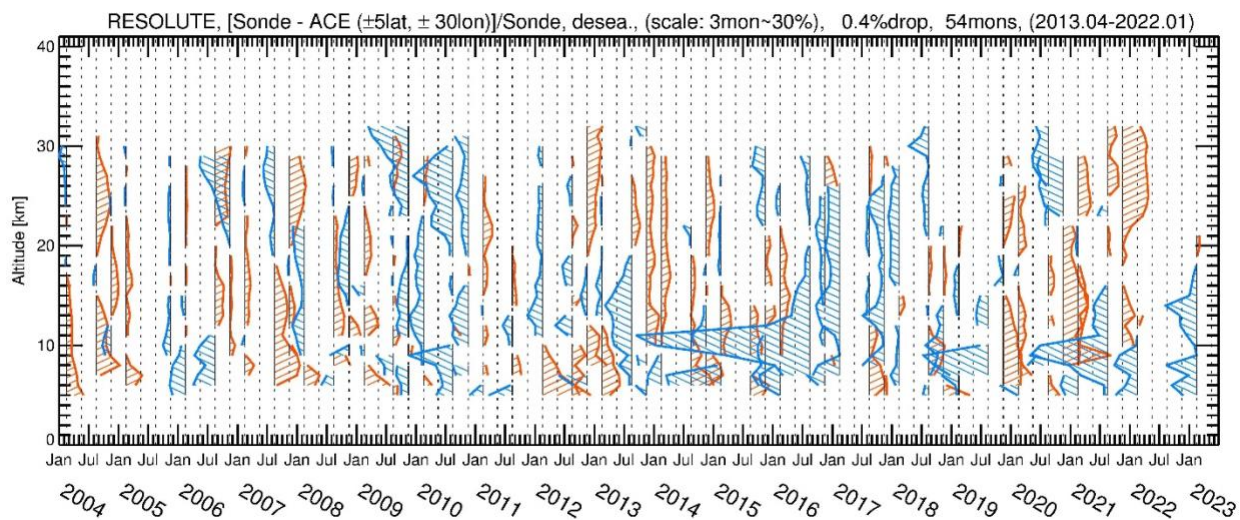

Fig. S3 Resolute



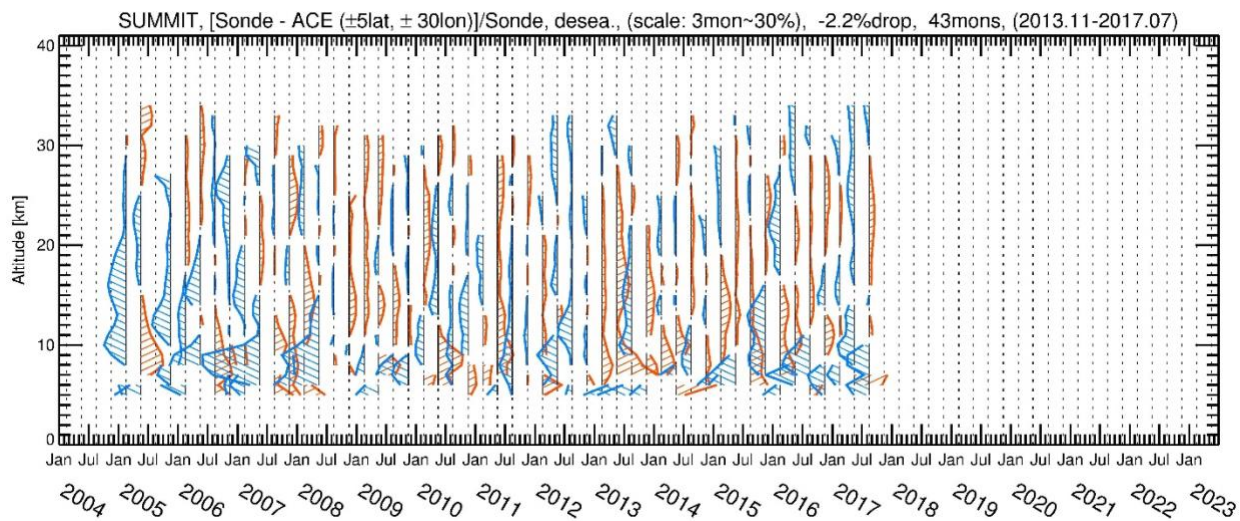

Fig. S4 Summit

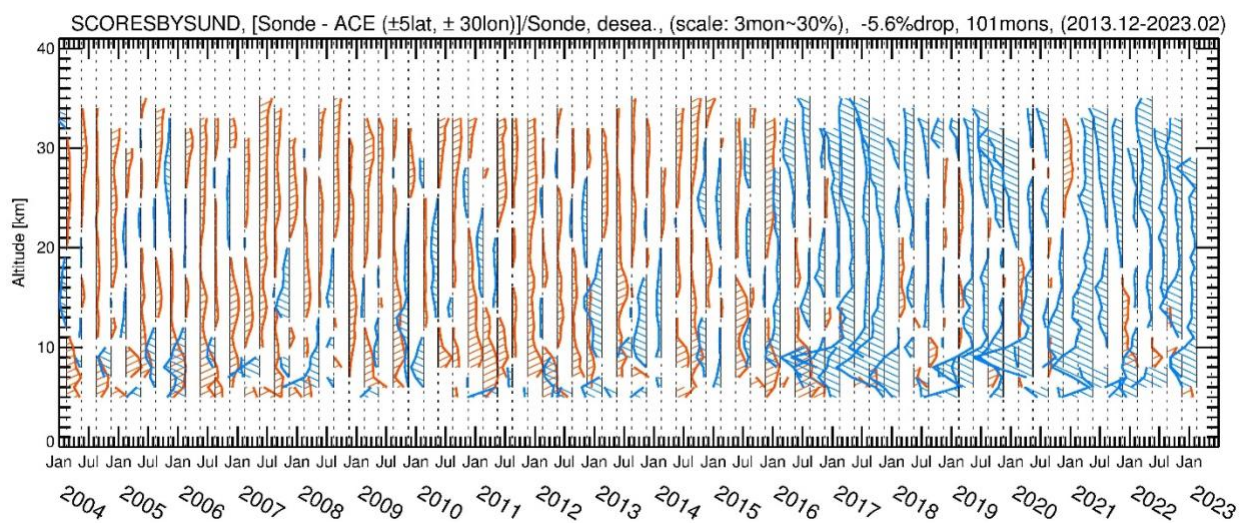

Fig. S5 Scoresbysund

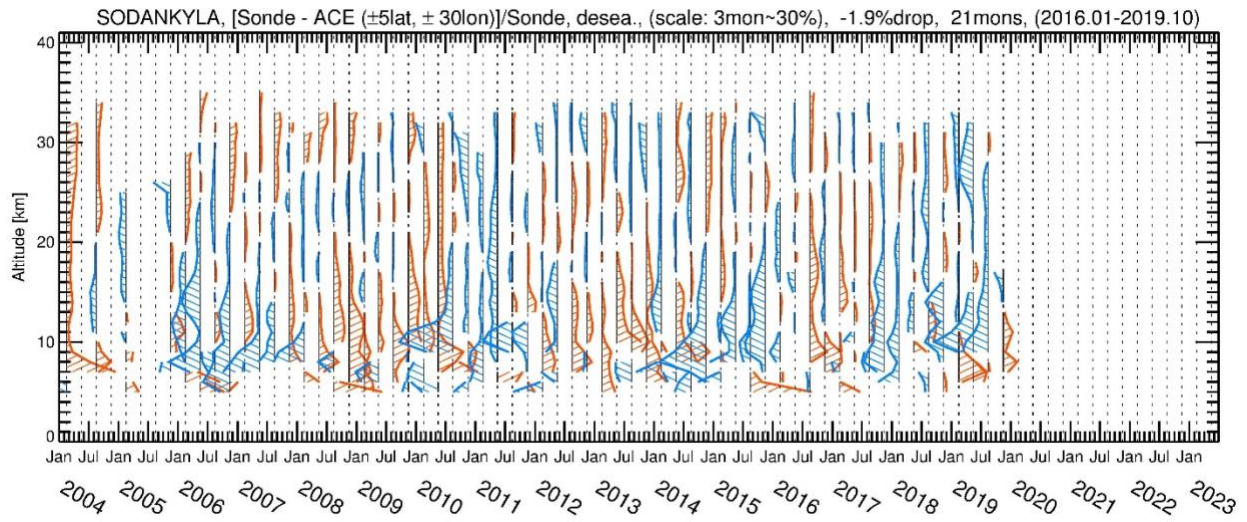

Fig. S6 Sodankyla

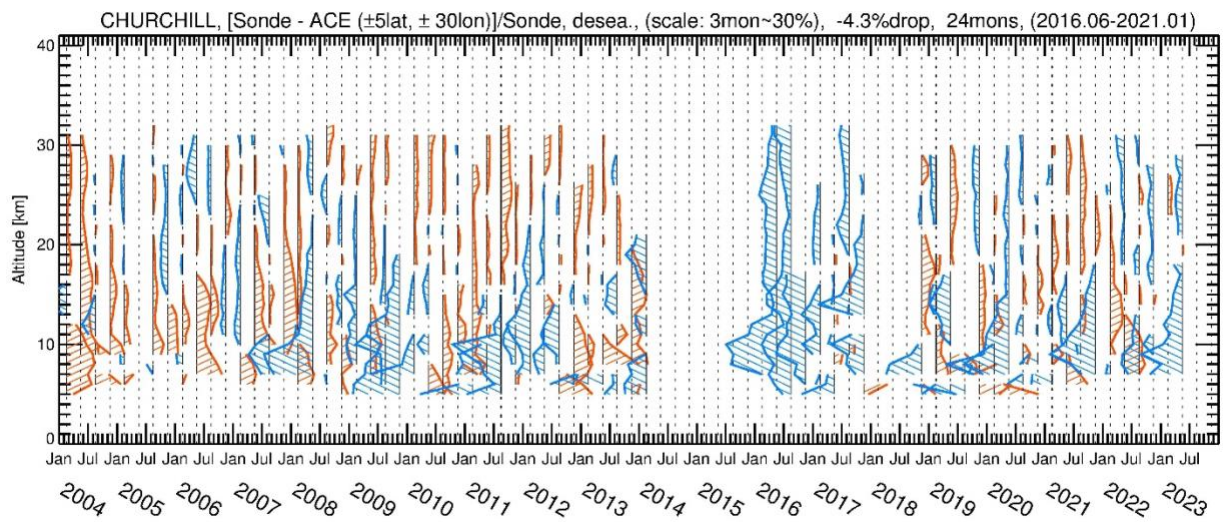

Fig. S7 Churchill



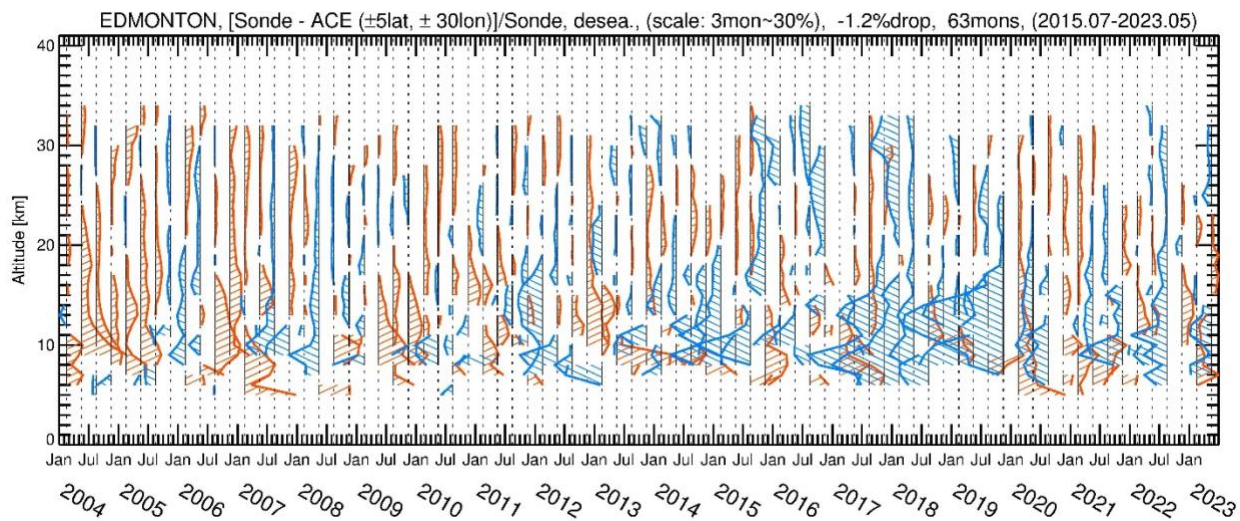

Fig. S8 Edmonton

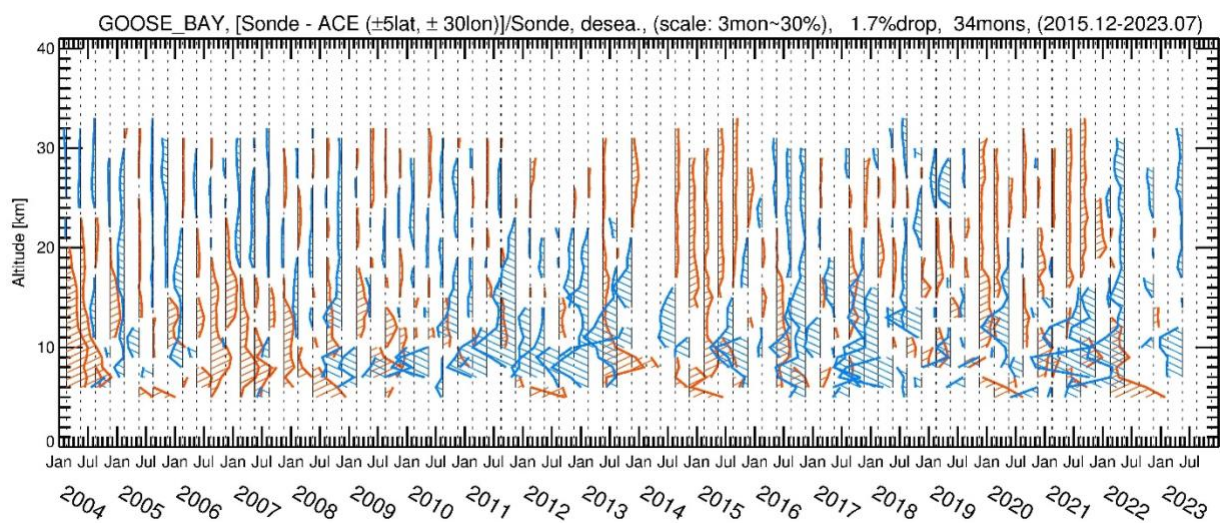

Fig. S9 Goose Bay

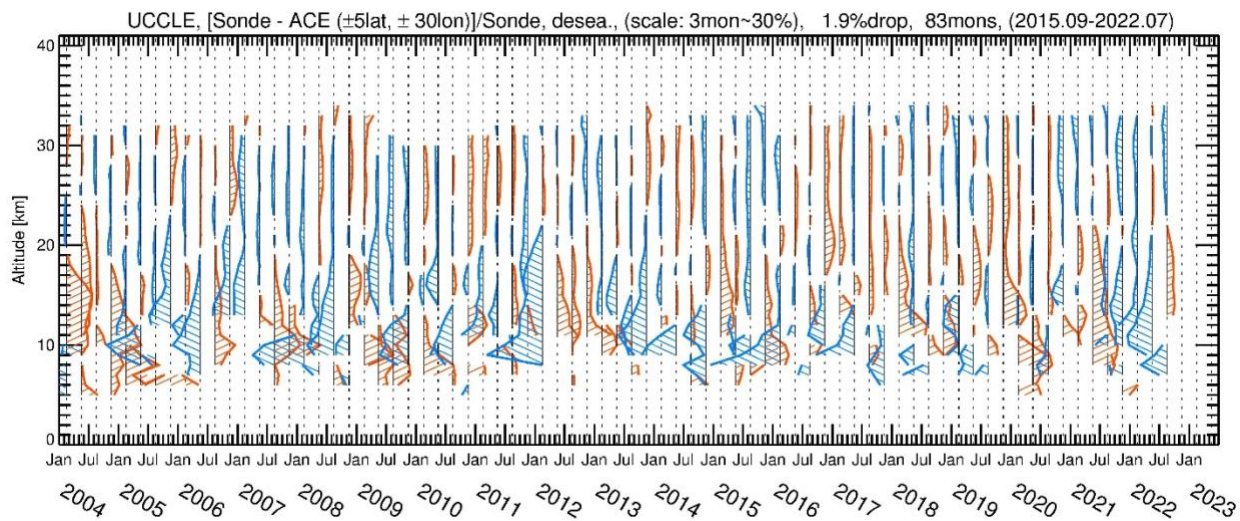

Fig. S10 UCCLE

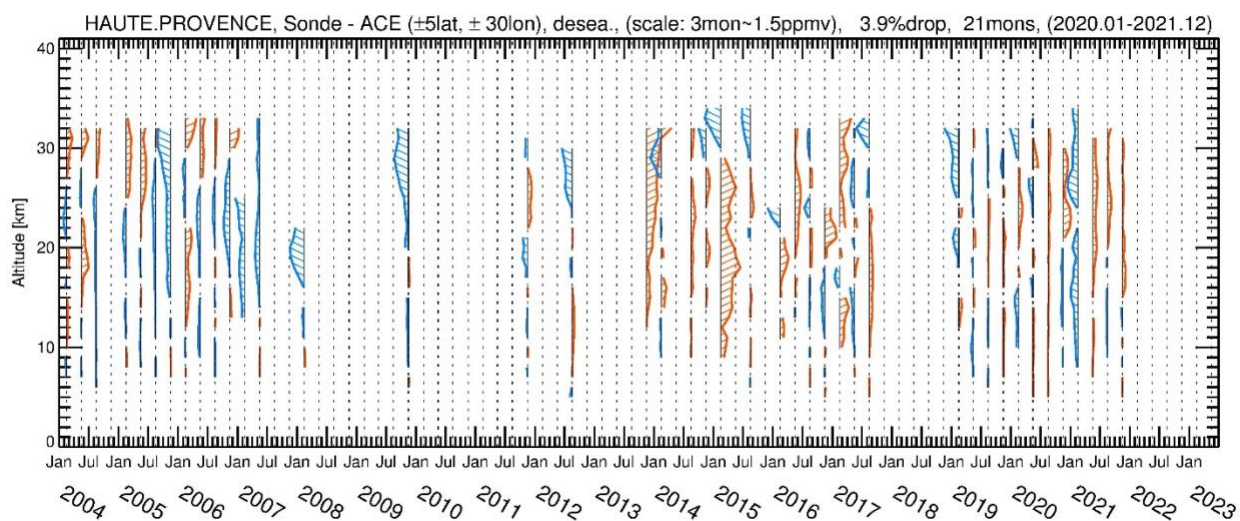

Fig. S11 OHP



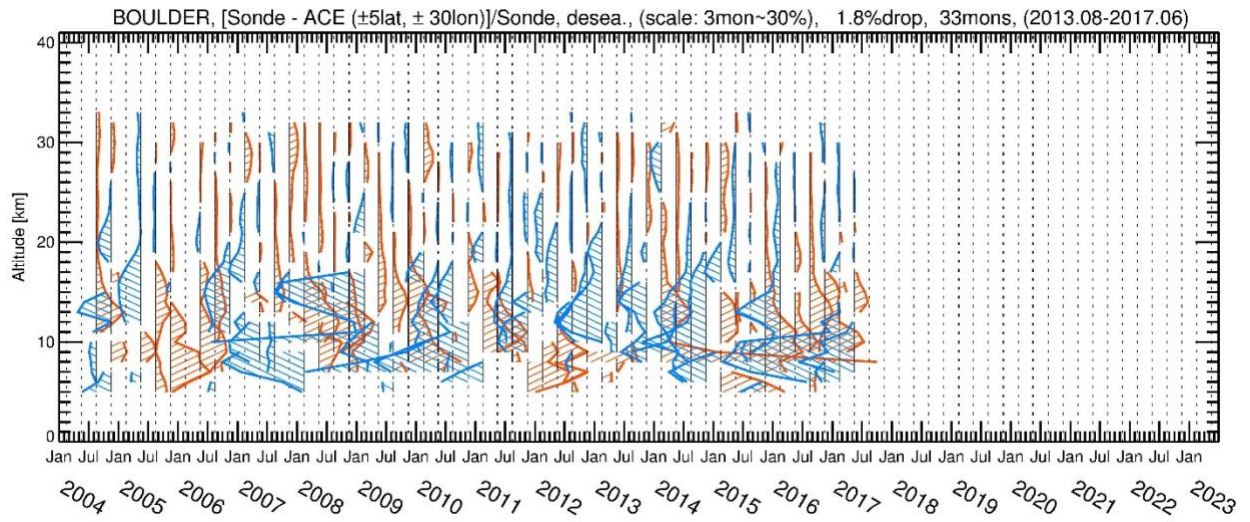

Fig. S12 Boulder

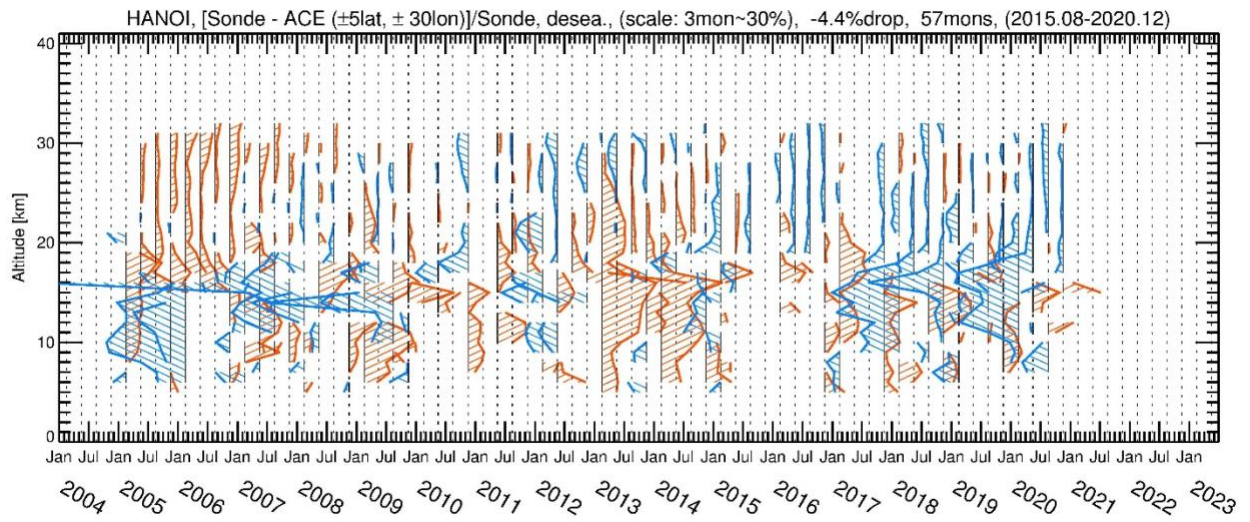

Fig. S13 Hanoi

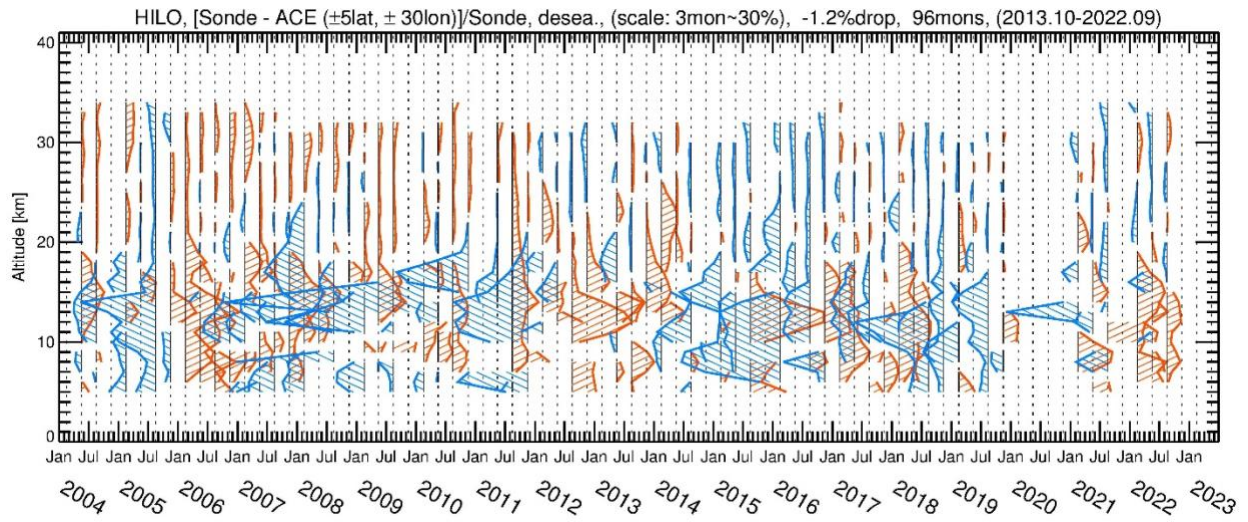

Fig. S14 Hilo

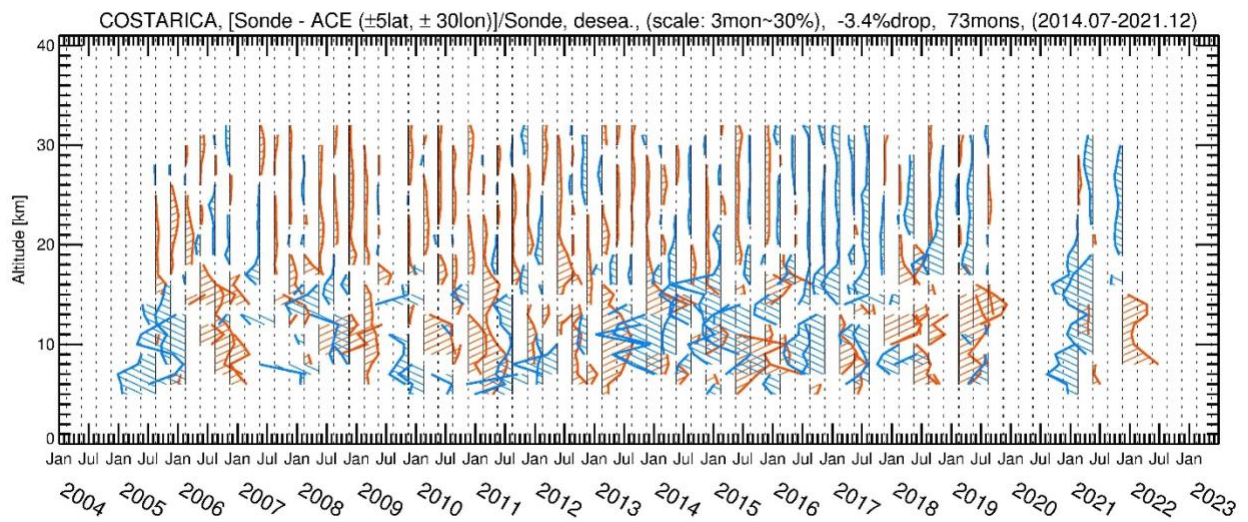

Fig. S15 Costa Rica



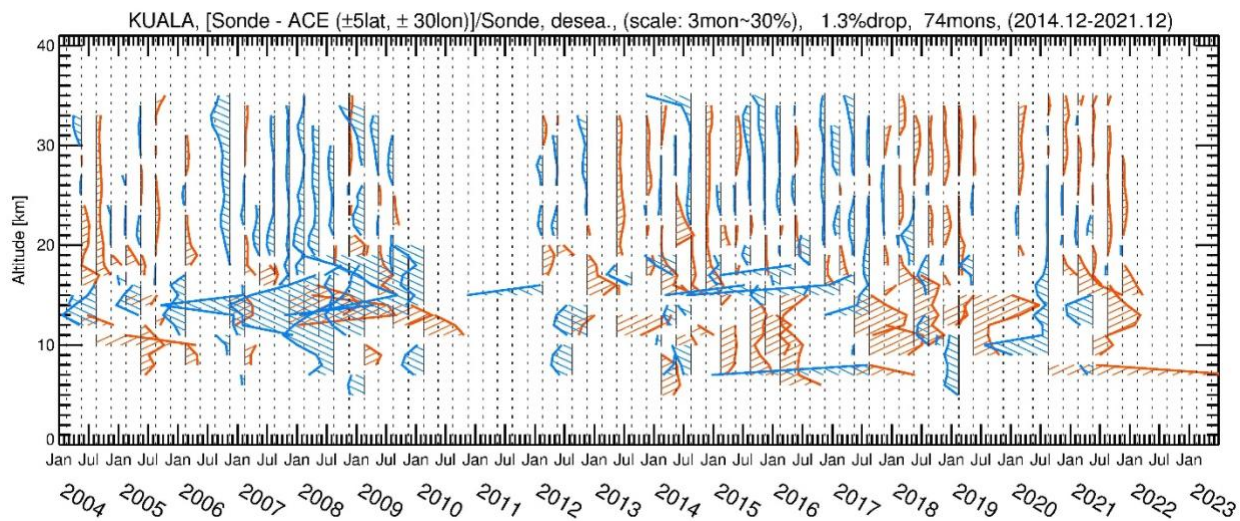

Fig. S16 Kuala Lumpur

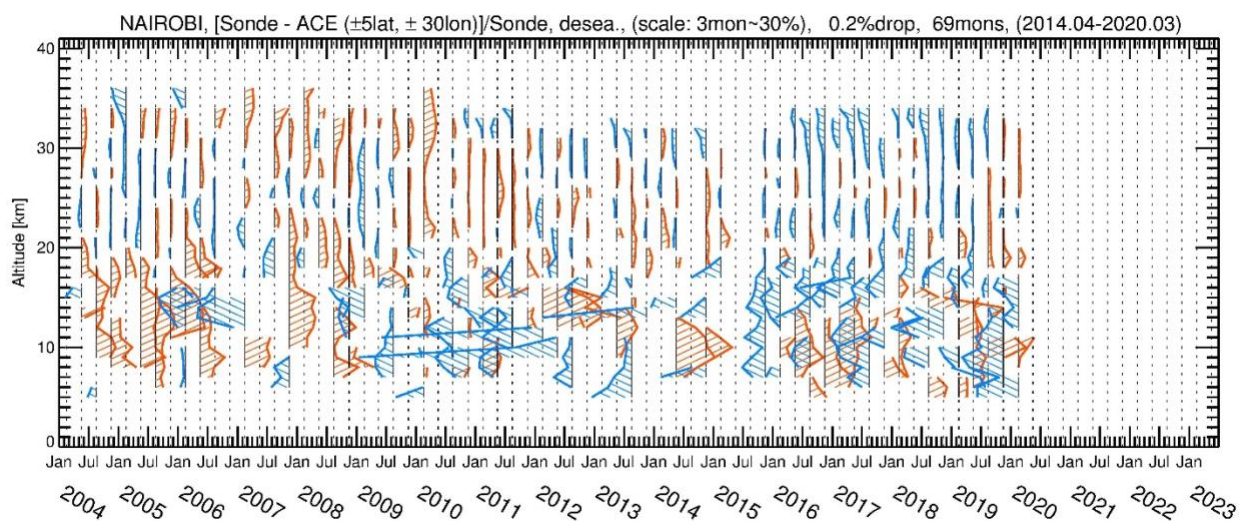

Fig. S17 Nairobi

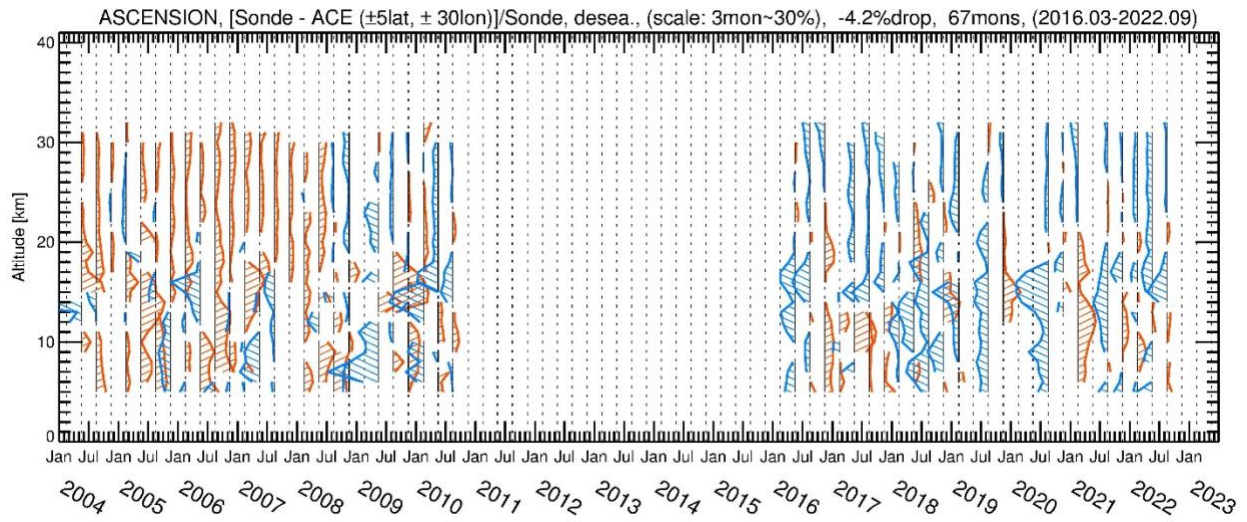

Fig. S18 Ascension

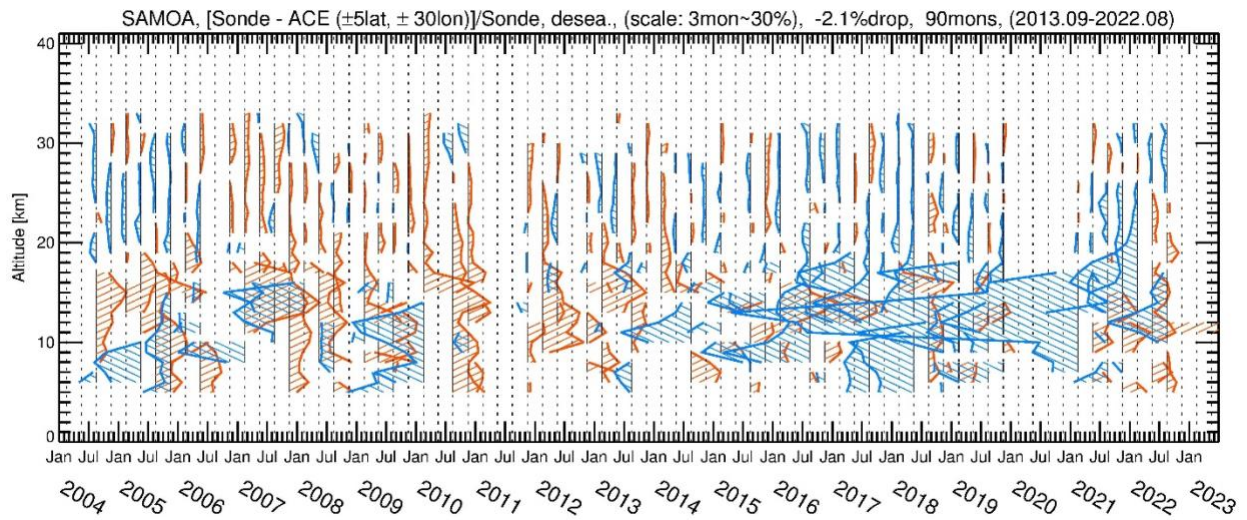

Fig. S19 Samoa



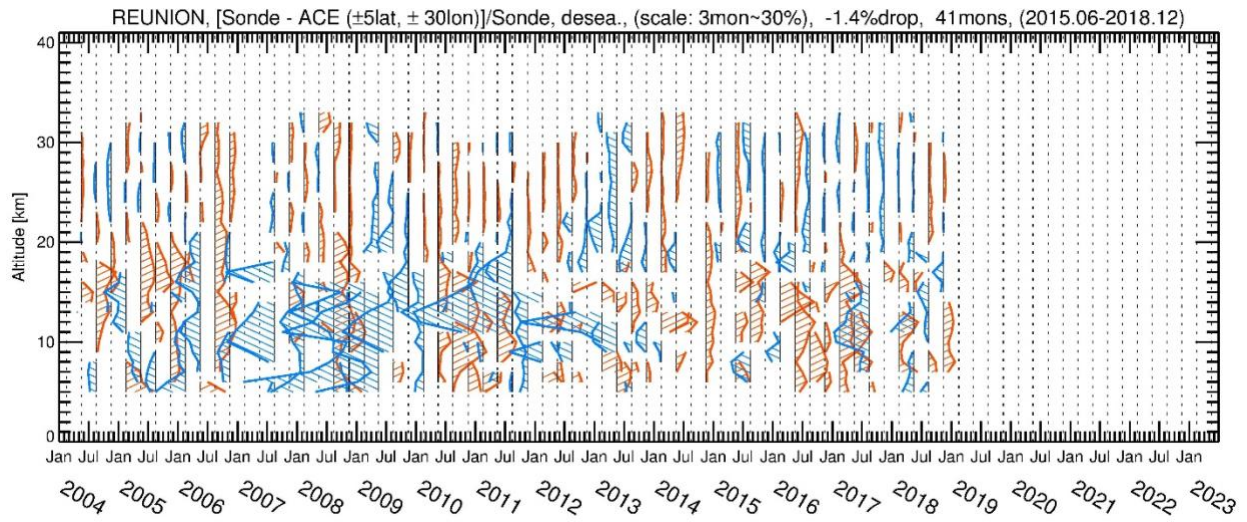

Fig. S20 Reunion

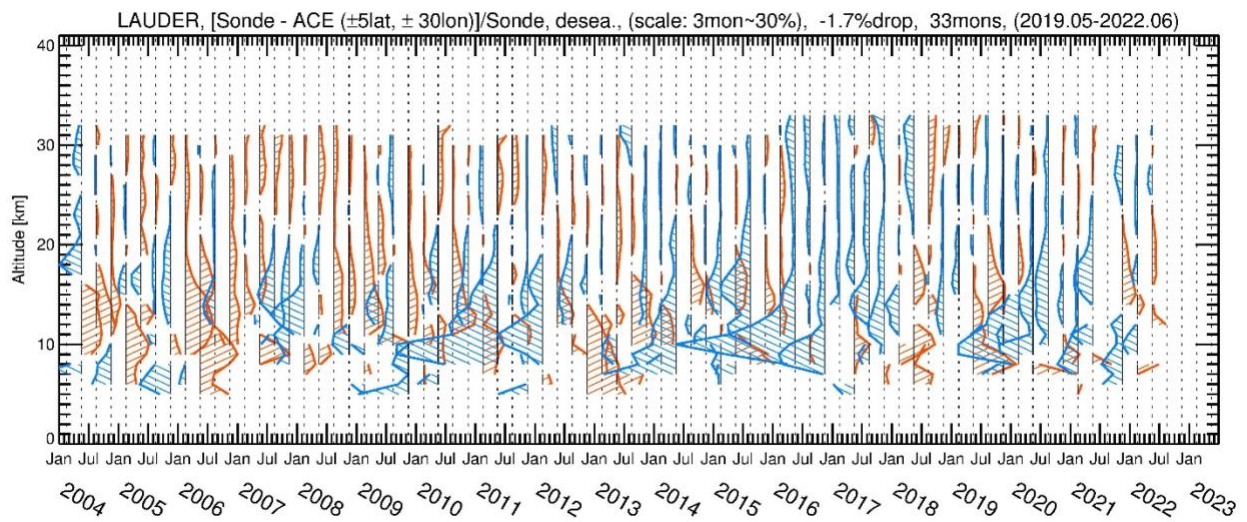

Fig. S21 Lauder

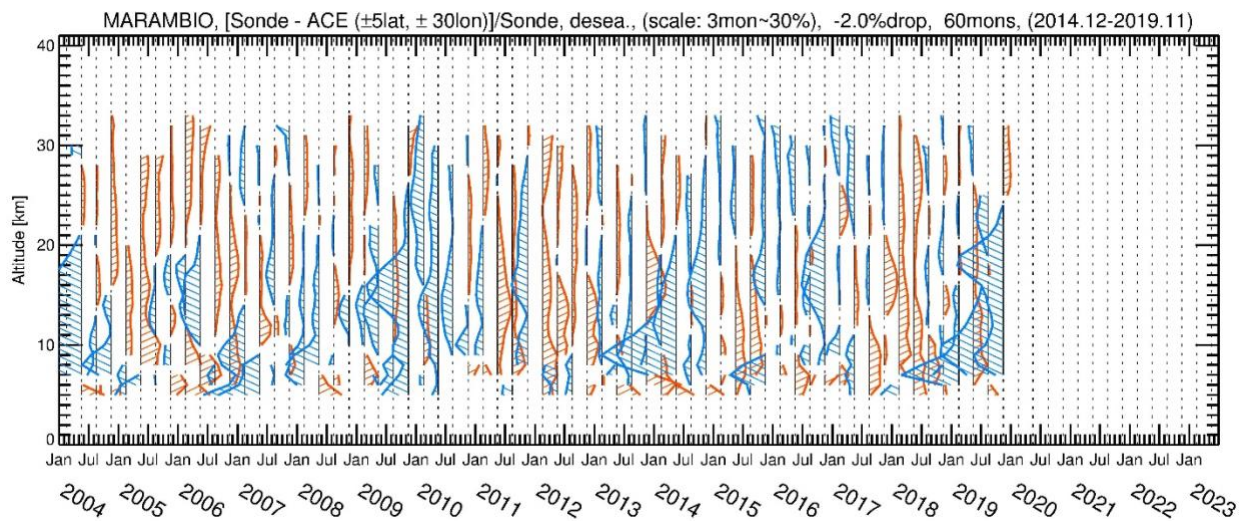

Fig. S22 Marambio

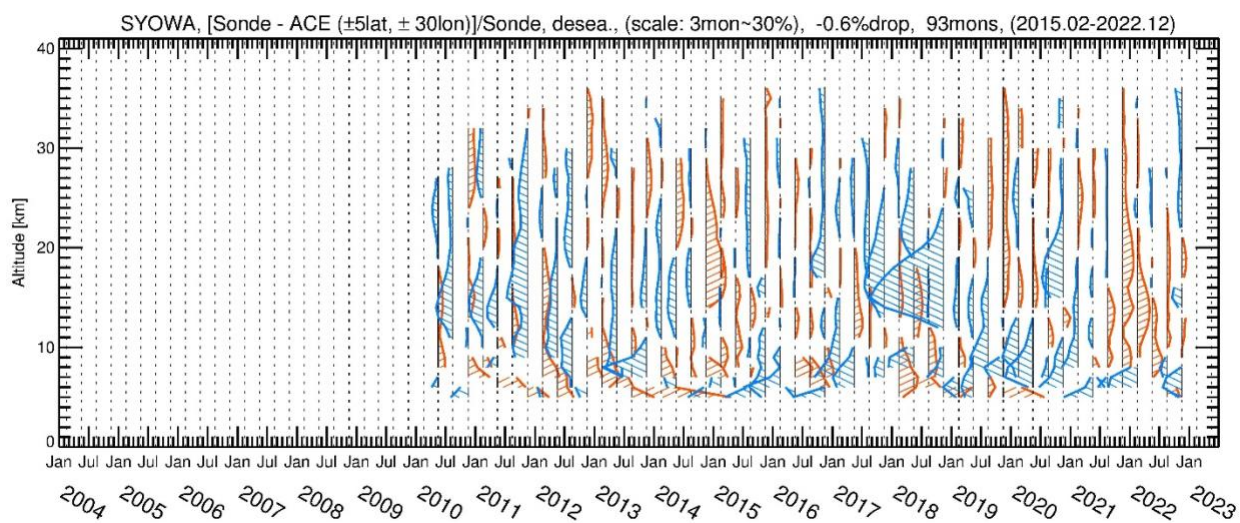

Fig. S23 Syowa
